# Supplementary figures and images for: Meteorin promotes the formation of GFAP-positive glia via activation of the Jak-STAT3 pathway
Source: Oxford University Press journal article supplement (doi:10.1242/jcs.063784), 2010-05-12

**A**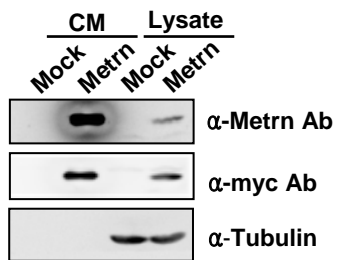**B**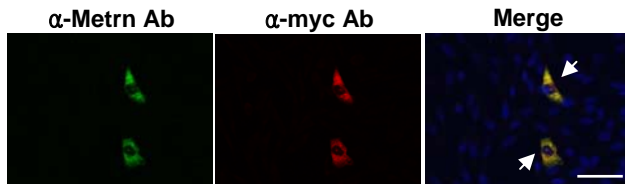

Supplement: jcs063784-sup-063784figs1.pdf [file jcs063784-sup-063784figs1.pdf]

**A**

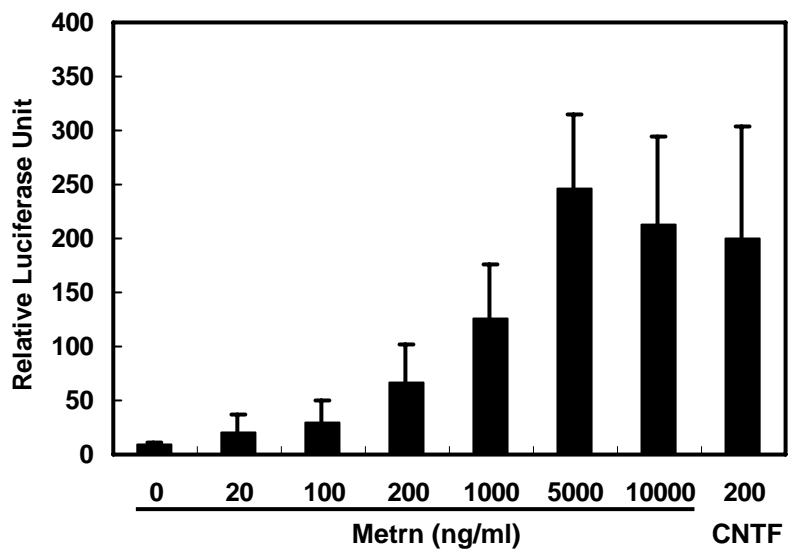

**B**

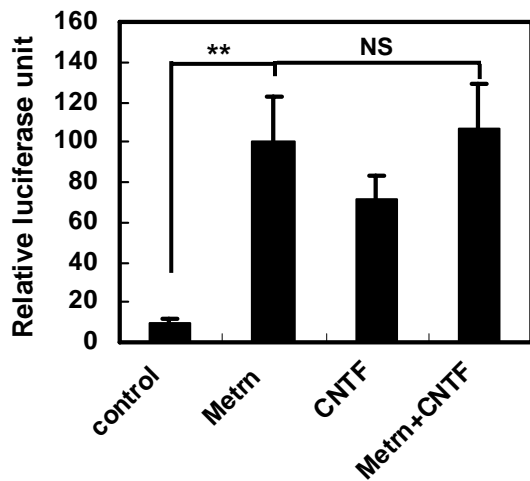

Supplement: jcs063784-sup-063784figs2.pdf [file jcs063784-sup-063784figs2.pdf]

**A**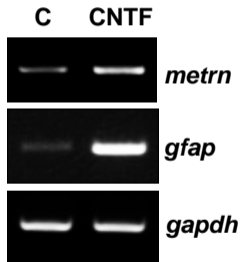**B**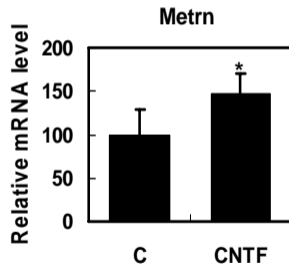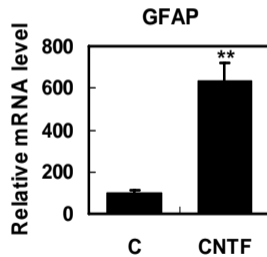

Supplement: jcs063784-sup-063784figs3.pdf [file jcs063784-sup-063784figs3.pdf]
